# Supplementary material for: Non-invasive optical control of endogenous Ca2+ channels in awake mice
Source: PubMed Central journal article supplement (PMC6954201; doi:10.1038/s41467-019-14005-4), 2020-01-10
Supplement: 41467_2019_14005_MOESM1_ESM.pdf [file 41467_2019_14005_MOESM1_ESM.pdf]

Supplementary Information

**Non-invasive optical control of  
endogenous Ca<sup>2+</sup> channels in awake mice**

Kim et al.

Supplementary Figure. 1. Sequence alignment of cryptochrome proteins from diverse species.

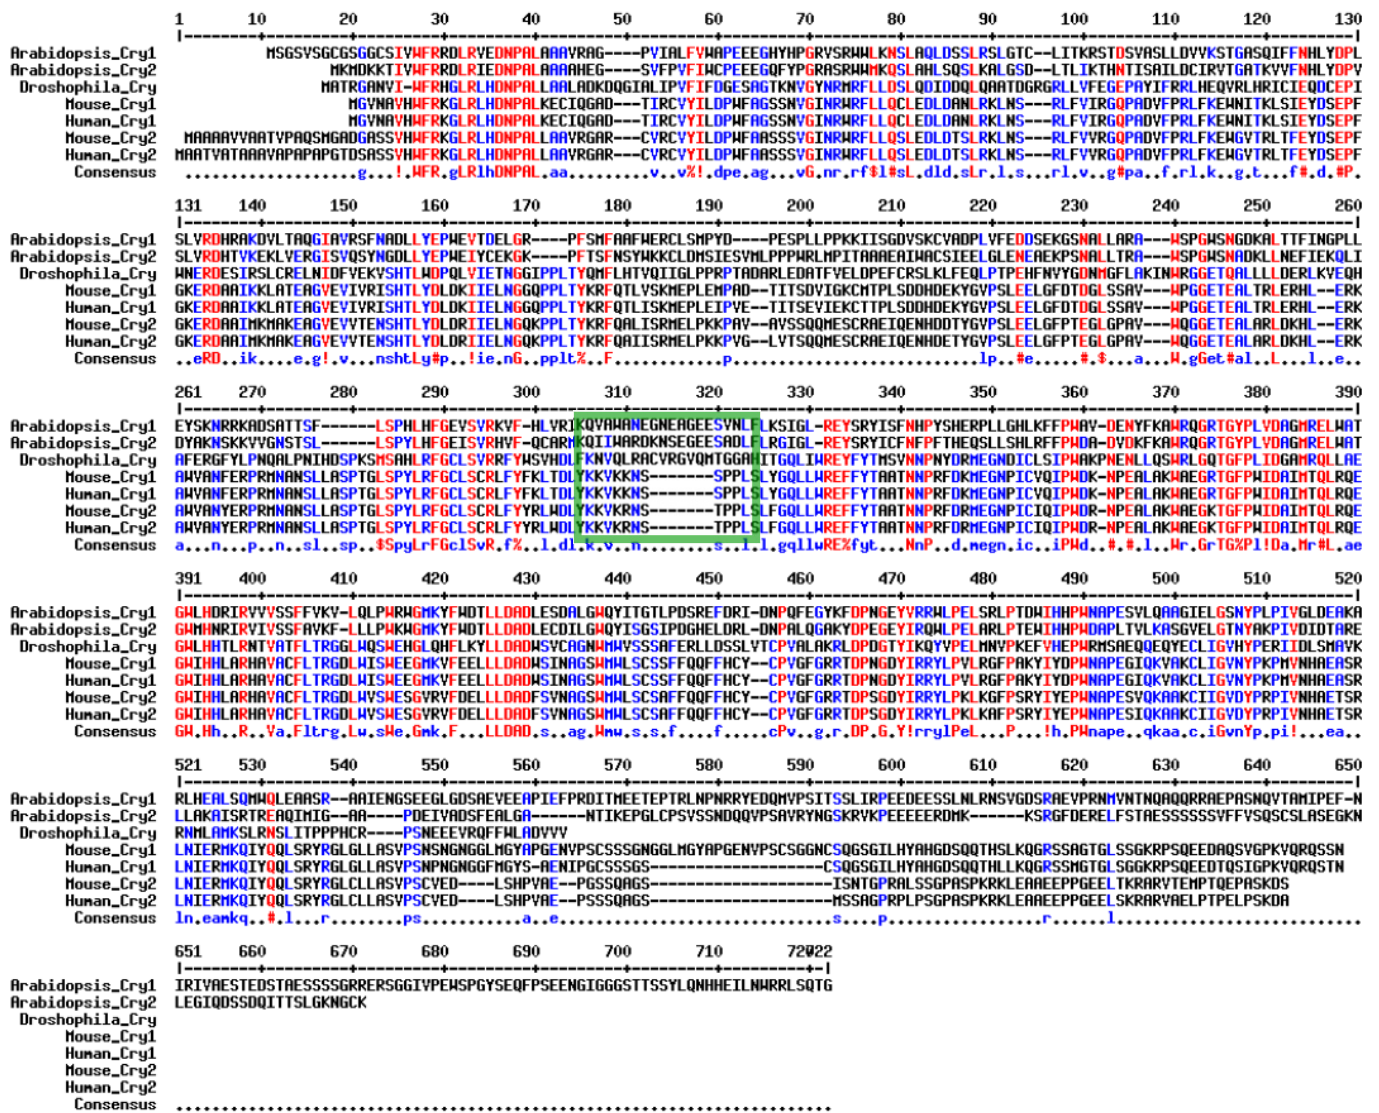

Sequence alignment of cryptochrome proteins from *Arabidopsis thaliana*, *Drosophila melanogaster*, *Mus musculus* and *Homo sapiens*. Sequence conservation from highest to lowest order is colored in red, blue and black. Potential protrusion loop of Arabidopsis cryptochrome for dimerization is marked by a green box.

**Supplementary Figure. 2. Tracing self-dissociated CRY2 mutants based on the crystal structures of *Drosophila* and *Arabidopsis* cryptochrome.**

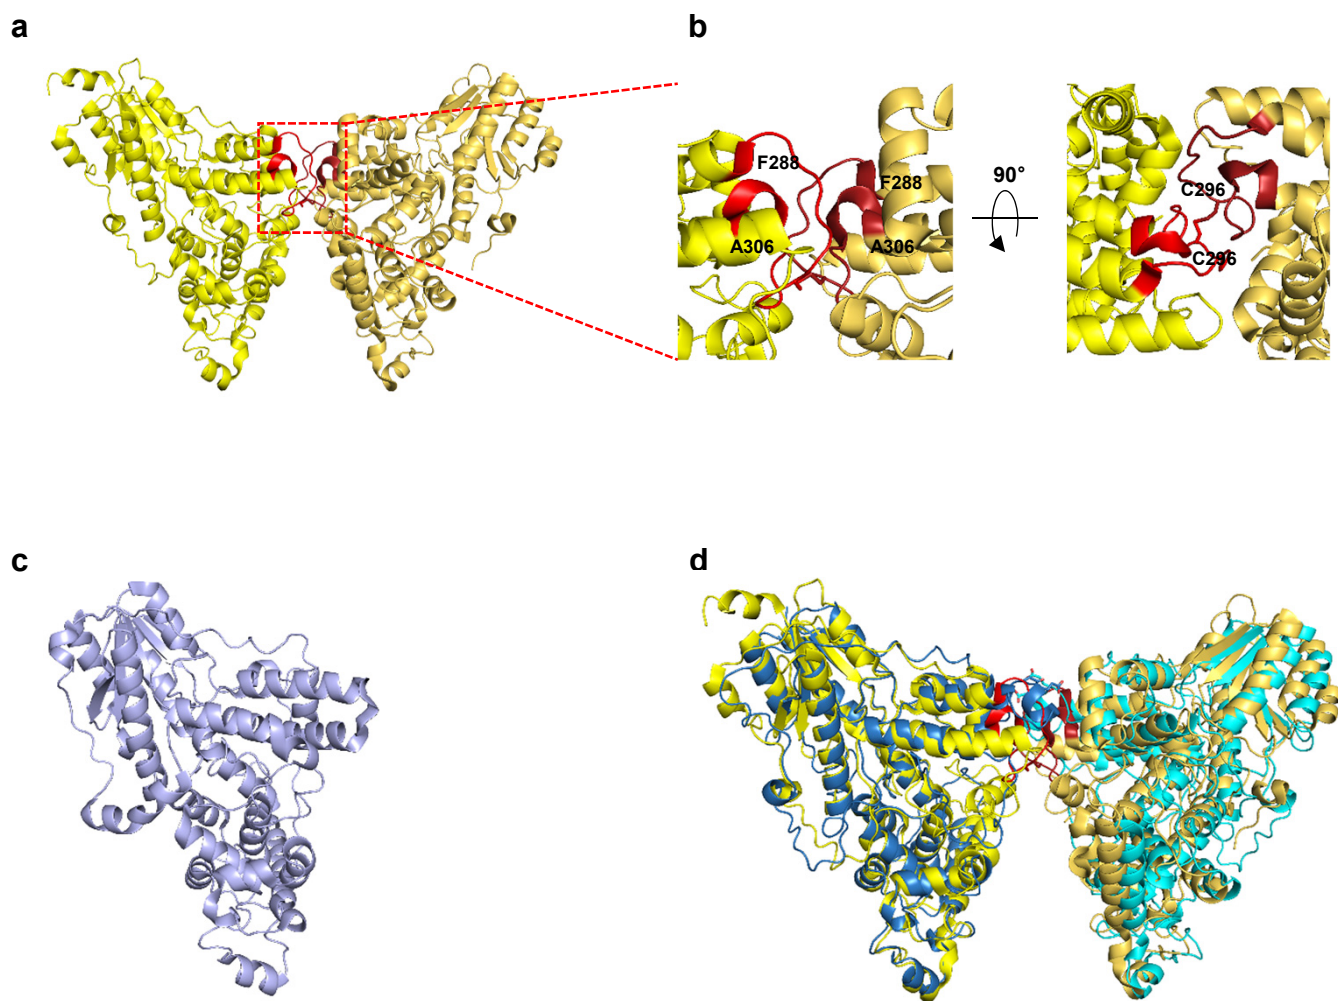

**(a)** Crystal structure of full-length *dCRY* represented as a dimeric form (PDB Code 4K03). **(b)** Close-up view of the protrusion loop (Phe288–Ala306) at the dimeric interface of *dCRY* shown in red and the 90° rotated view to show the disulfide bridge between Cys296 within the loop. **(c)** Crystal structure of *AtCRY1* (PDB code: 1U3D) shown in light blue, which was used as the model template for *AtCRY2* modeling. **(d)** Overlap of dimeric *dCRY* structure (yellow and orange) with *AtCRY2* model structure (blue and cyan).

**Supplementary Figure. 3. Intracellular calcium level in individual cells expressing OptoSTIM1 variants.**

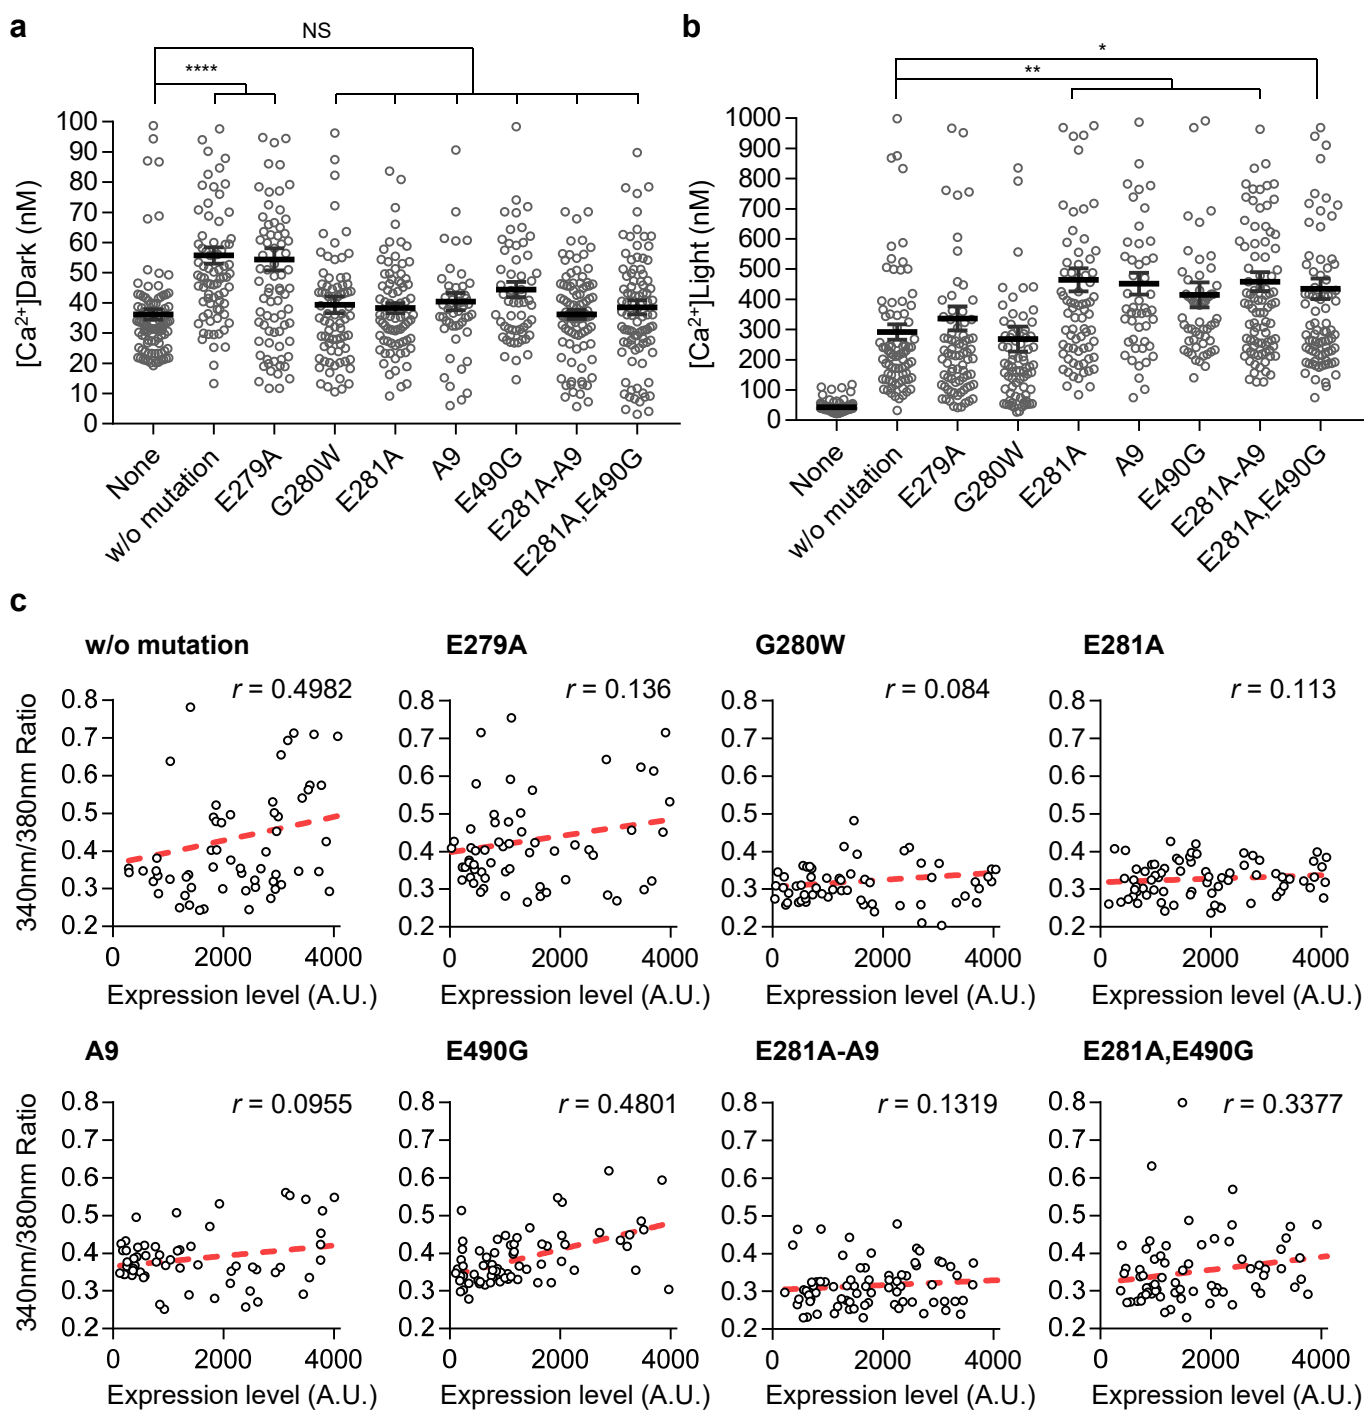

Graphs representing basal **(a)** and light-induced elevated calcium level **(b)** measured by Fura-2. Gray dots indicate individual cells.  $n \geq 50$  cells in each group. Error bar, s.e.m. Statistical significance was obtained by Tukey's test (NS = Not significant; \* $P < 0.05$ ; \*\* $P < 0.01$ ; \*\*\*\* $P < 0.0001$ ). **(c)** Graphs showing emission ratio of Fura-2 dye excited at wavelength of 340 and 380 nm according to the expression level of each variant in HeLa cells. Linear regression lines was presented as red dotted lines. ( $n \geq 60$  cells in each graphs,  $r$  is spearman correlation)

**Supplementary Figure. 4. Activation and deactivation kinetic properties of OptoSTIM1 variants.**

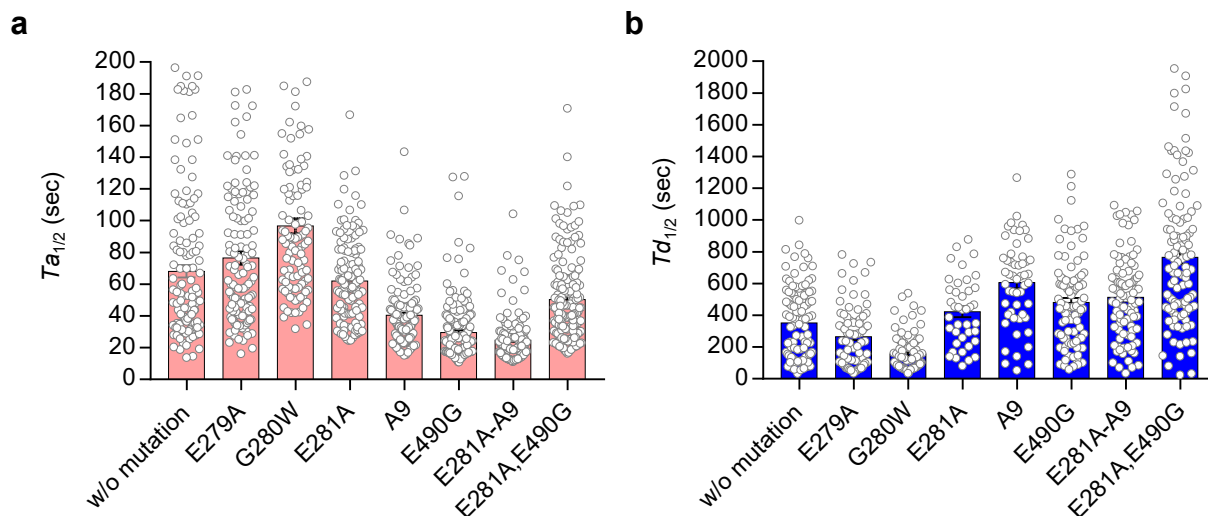

Graphs representing half-maximal time for reaching saturated R-GECO1 intensity upon light stimulation (a) and basal R-GECO1 intensity in dark (b) for each designated variants. Gray dots indicate individual cells.  $n \geq 50$  of each variants. Cells expressing each OptoSTIM1 variants were exposed blue light for 1 min at 5 sec intervals in  $500 \mu\text{W mm}^{-2}$  light density. Error bars, s.e.m.

**Supplementary Figure. 5. Measurement of phosphorylated CREB level in cells expressing OptoSTIM1 variants.**

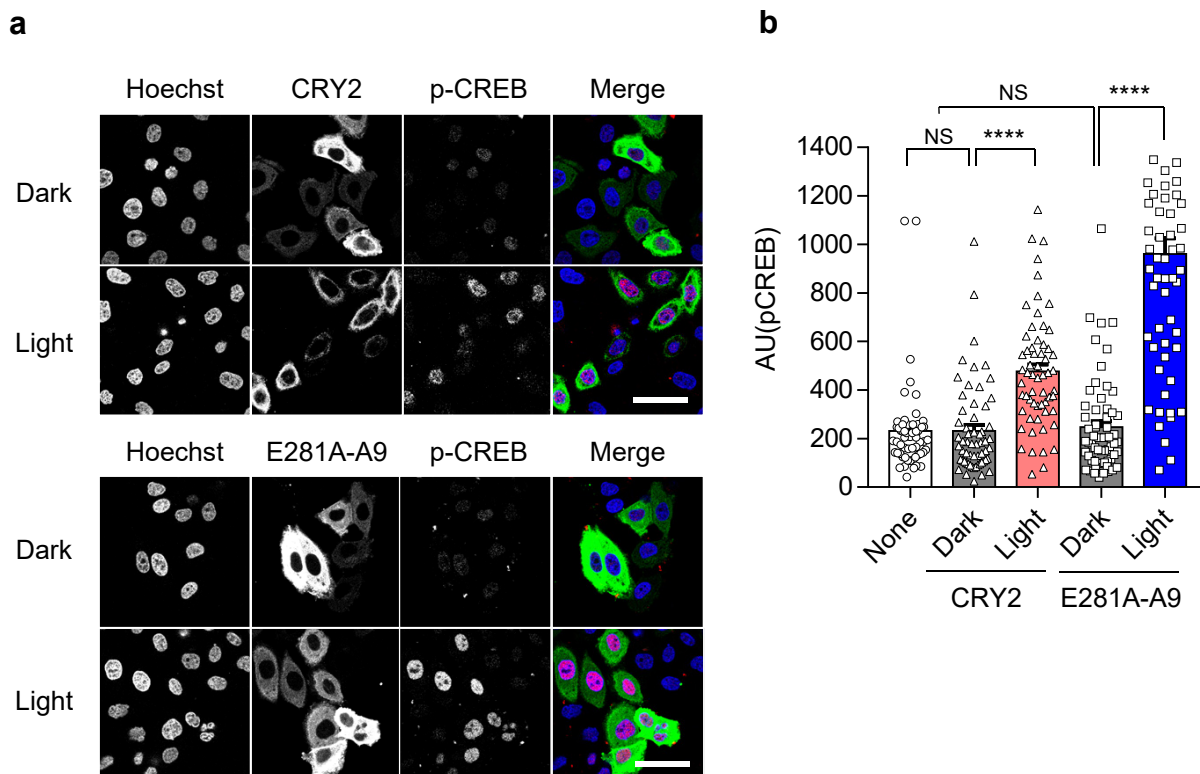

**(a)** Fluorescence images showing immunostained p-CREB in HeLa cells either transfected with OptoSTIM1(CRY2) or OptoSTIM1(CRY2<sup>E281A</sup>-A9) in dark or light stimulated condition. Scale bars, 50  $\mu$ m. **(b)** Graph indicating average fluorescent intensity of p-CREB shown in a.  $n = 60$  in each group. \*\*\*\* $P < 0.0001$  for Dark versus Light in cells expressing OptoSTIM1 and \*\*\*\* $P < 0.0001$  for Dark versus Light in cells expressing OptoSTIM1(CRY2<sup>E281A</sup>-A9) by Student's two-tailed  $t$ -test. NS = not significant. Error bars, s.e.m.

**Supplementary Figure. 6. Efficiency of Ca<sup>2+</sup> influx induced by OptoSTIM1 variants under stimulation with different light densities.**

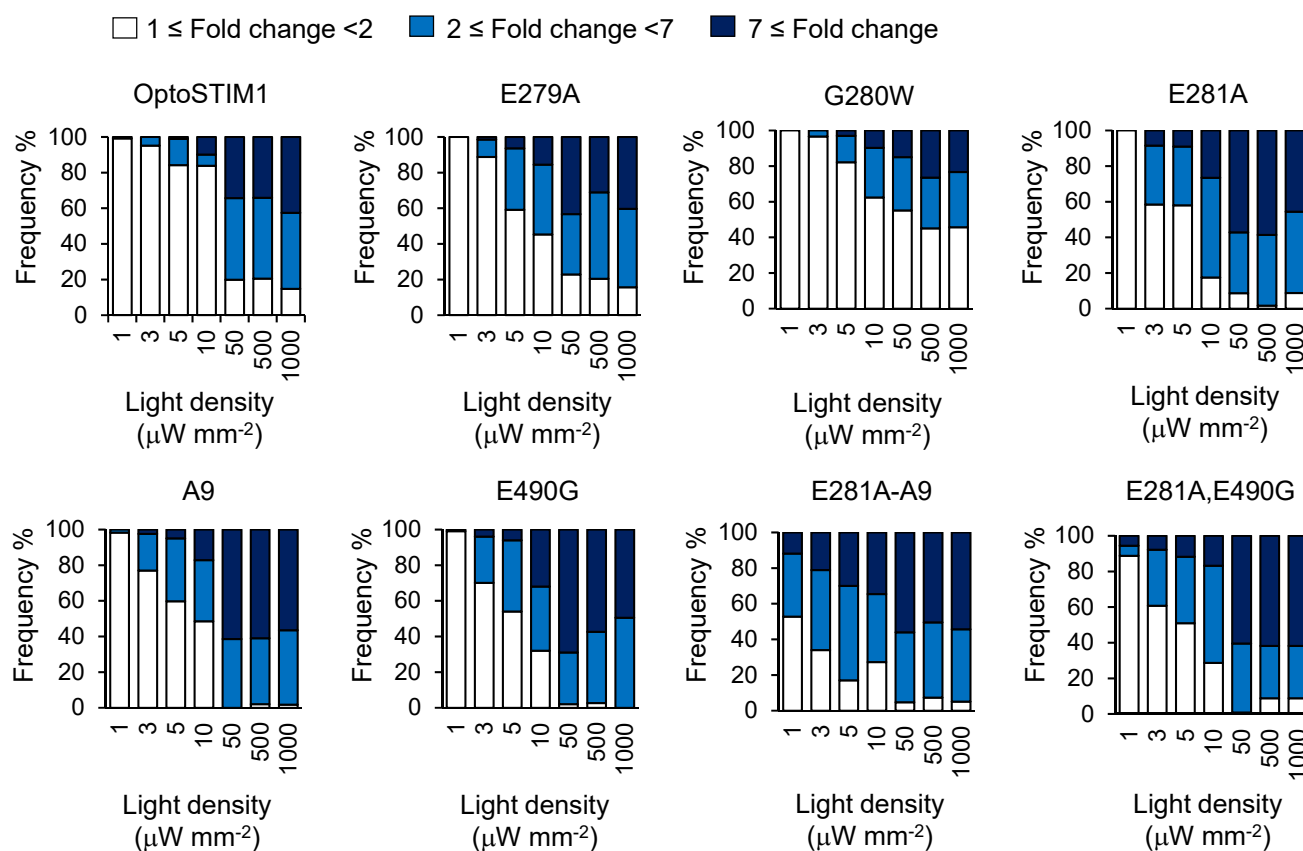

Graphs showing population of cells at indicated ranges of fold changes of R-GECO1 intensity in HeLa cells expressing each OptoSTIM1 variant. Cells were illuminated by blue light for 1min at 5 sec intervals and maximal intensity of R-GECO1 in each cell was normalized by fluorescence intensity (at  $t = 0$ ). Frequency (%) was calculated by dividing the number of cells in each range of maximal fold-change by the number of total cells in each group. ( $n \geq 100$  in each bar graphs)

**Supplementary Figure. 7. Light dose-dependent maximal  $\text{Ca}^{2+}$  increase by OptoSTIM1 variants.**

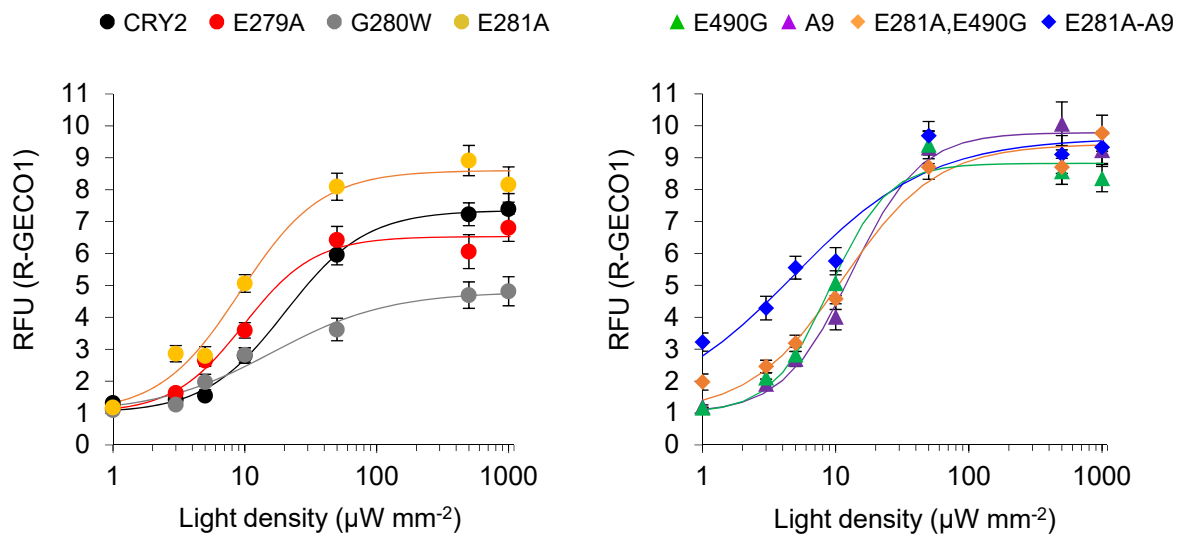

Graph showing averaged maximal R-GECO1 fluorescence level at diverse light-density. Cells were illuminated by blue light for 1 min at 5 sec intervals and maximal intensity of R-GECO1 in each cell was normalized by fluorescence intensity (at  $t = 0$ ). ( $n \geq 100$  for each variant). Error bars, s.e.m.



**Supplementary Figure. 8. Activation and deactivation kinetics of OptoSTIM1 variants activated under various light densities.**

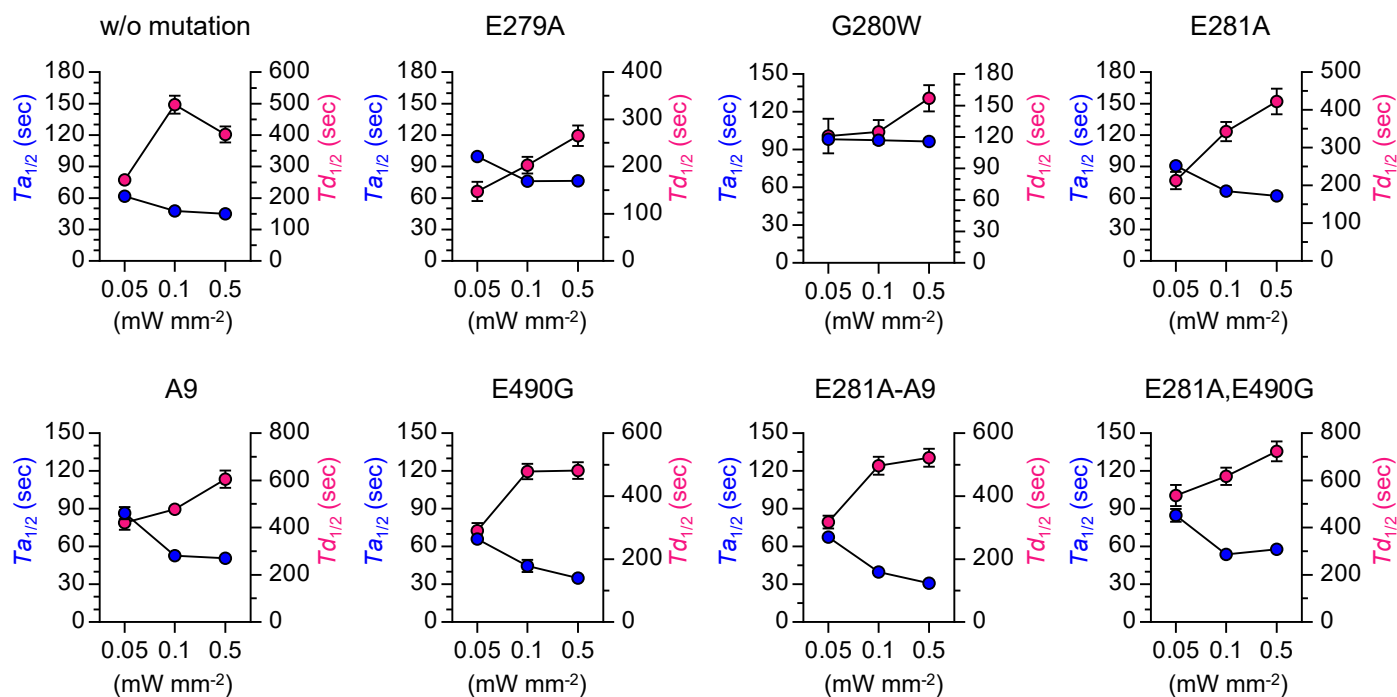

Graphs representing half-maximal time for reaching saturated R-GECO1 intensity upon light stimulation (left y-axis) and basal R-GECO1 intensity in dark (right y-axis) for each designated variant in disperse condition of light density.  $n \geq 40$  for each variant. Cells were exposed to blue light for 1 min at 5 sec intervals at designated light density. Error bars, s.e.m.

**Supplementary Figure. 9. Negligible effect of photoactivation of R-GECO1 in assessing  $\text{Ca}^{2+}$  influx level induced by activated monSTIM1.**

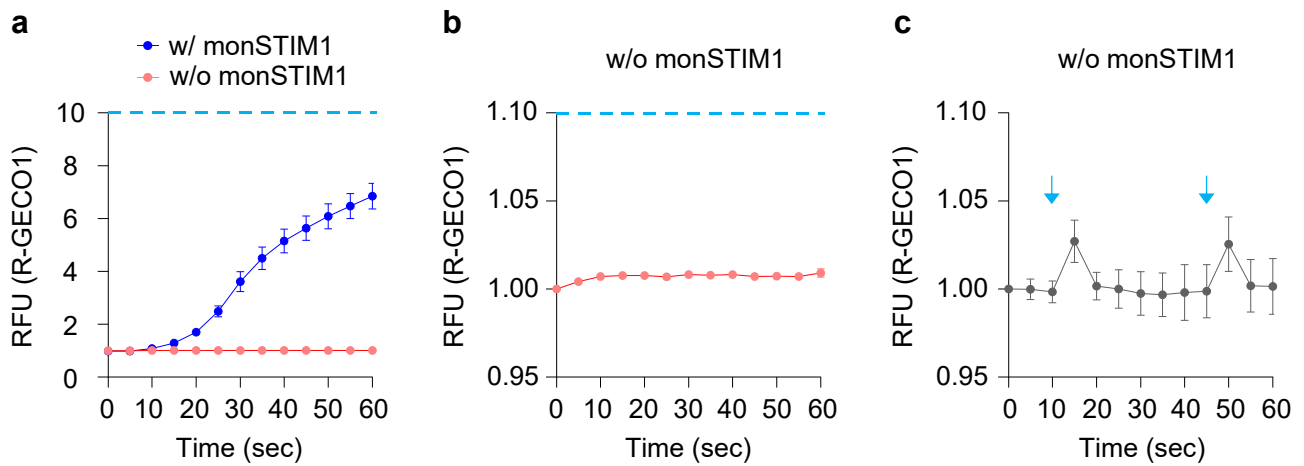

Graphs showing fold change in fluorescence intensity of R-GECO1 based on time-lapse imaging. **(a)** HeLa cells expressing R-GECO1 with or without monSTIM1 was simultaneously imaged with  $100 \mu\text{W mm}^{-2}$  density of 488 nm light with 561 nm light at 5-seconds intervals. Error bars, s.e.m. **(b)** Zoomed-in version of highlighted graph in **a**. **(c)** Photoactivatable property of R-GECO1. Blue light was stimulated at time points indicated by blue arrows ( $100 \mu\text{W mm}^{-2}$  for 500 ms). Error bars, s.e.m.

**Supplementary Figure. 10. Fundamental properties of monSTIM1**

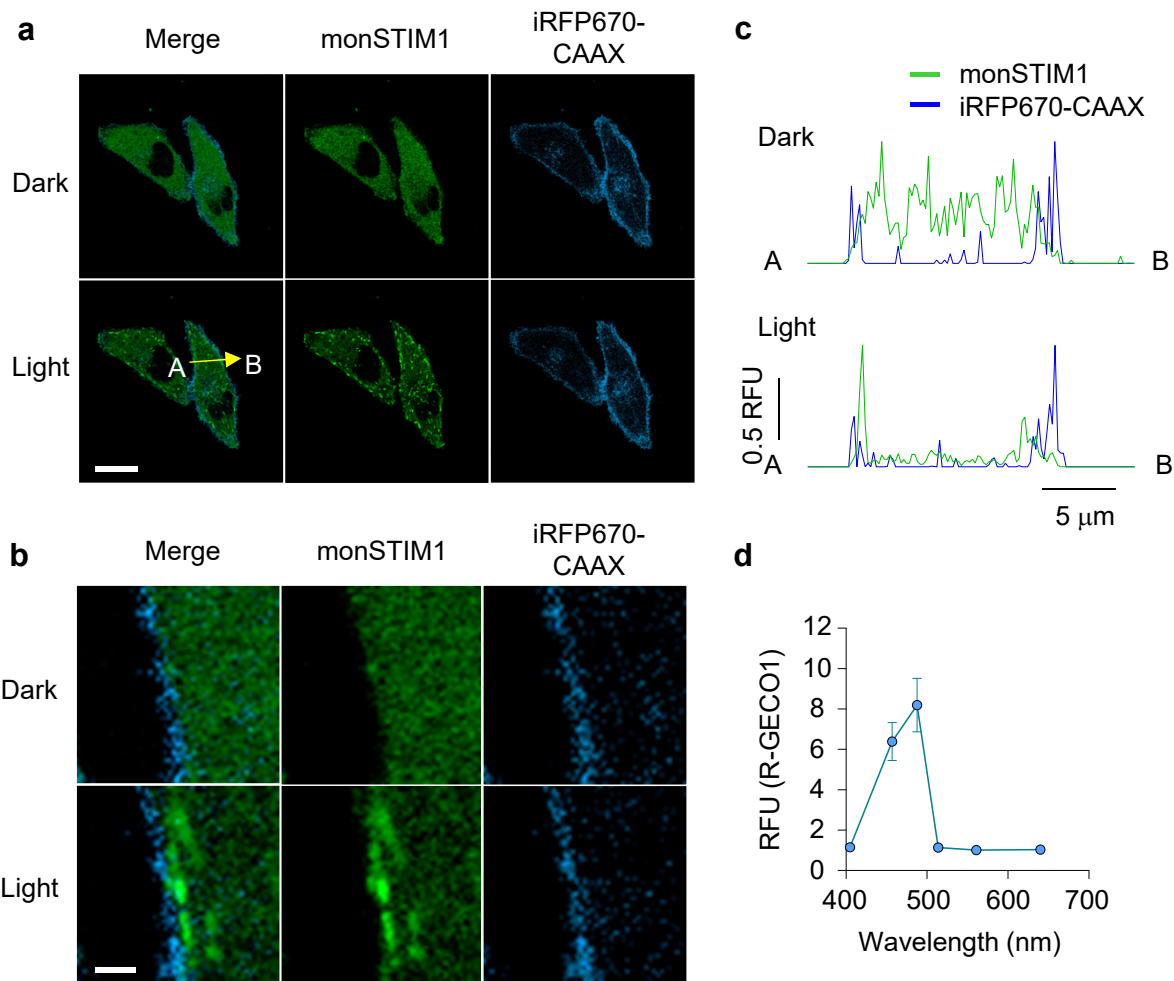

**(a)** Fluorescence images showing subcellular distribution of monSTIM1 upon blue light irradiation. HeLa cells co-expressing iRFP670-PM(KRas4B tail) were exposed by blue light for 5 min at 5 sec intervals. Scale bar, 20  $\mu$ m. **(b)** Magnified images showing light dependent translocation of monSTIM1 to the plasma membrane. Scale bar, 2  $\mu$ m. **(c)** Graphs representing normalized fluorescence intensity of monSTIM1 (green) and iRFP670-PM (blue) corresponding to the yellow line in panel **a**. **(d)** Light spectrum for activating monSTIM1. HeLa cells were exposed to light for 1 min at 5 sec intervals at designated wavelength of light (405, 457, 488, 514, 561 and 640 nm respectively). Error bars, s.e.m.

## Supplementary Figure. 11. Analysis of oligomeric properties of STIM1-fused proteins

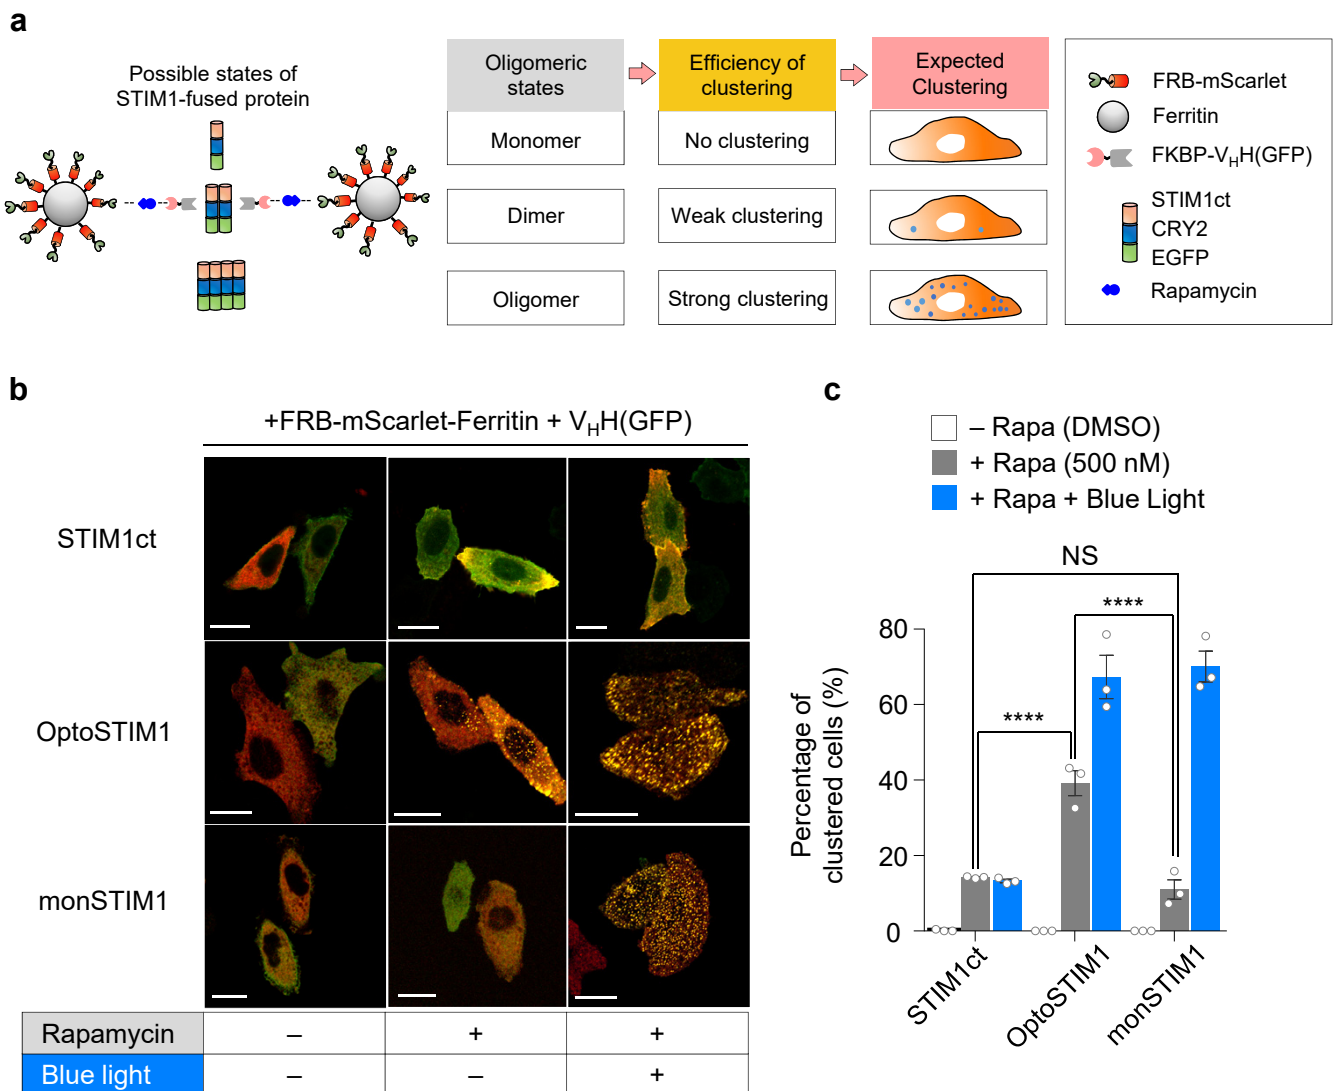

**(a)** Schematic depiction of InCell SMART-i for assessing interaction properties of CRY2-STIM1ct (a.a 238–685) with or without blue light illumination. **(b)** Fluorescence images showing intracellular cluster formation upon rapamycin treatment (500 nM) in HeLa cells co-expressing FKBP-V<sub>H</sub>H(GFP), FRB-mScarlet-Ferritin, and EGFP tagged STIM1ct, OptoSTIM1, or monSTIM1 both in dark and light. Scale bar, 20  $\mu$ m **(c)** Graph indicating percentage of clustered cells at each described condition. Statistical significant was obtained by Tukey's test, \*\*\*\* $P < 0.0001$ ; NS = Not significant. Error bars, s.e.m.

**Supplementary Figure. 12. Application of light sensitive CRY2 in optical activation of fibroblast growth factor receptor 1.**

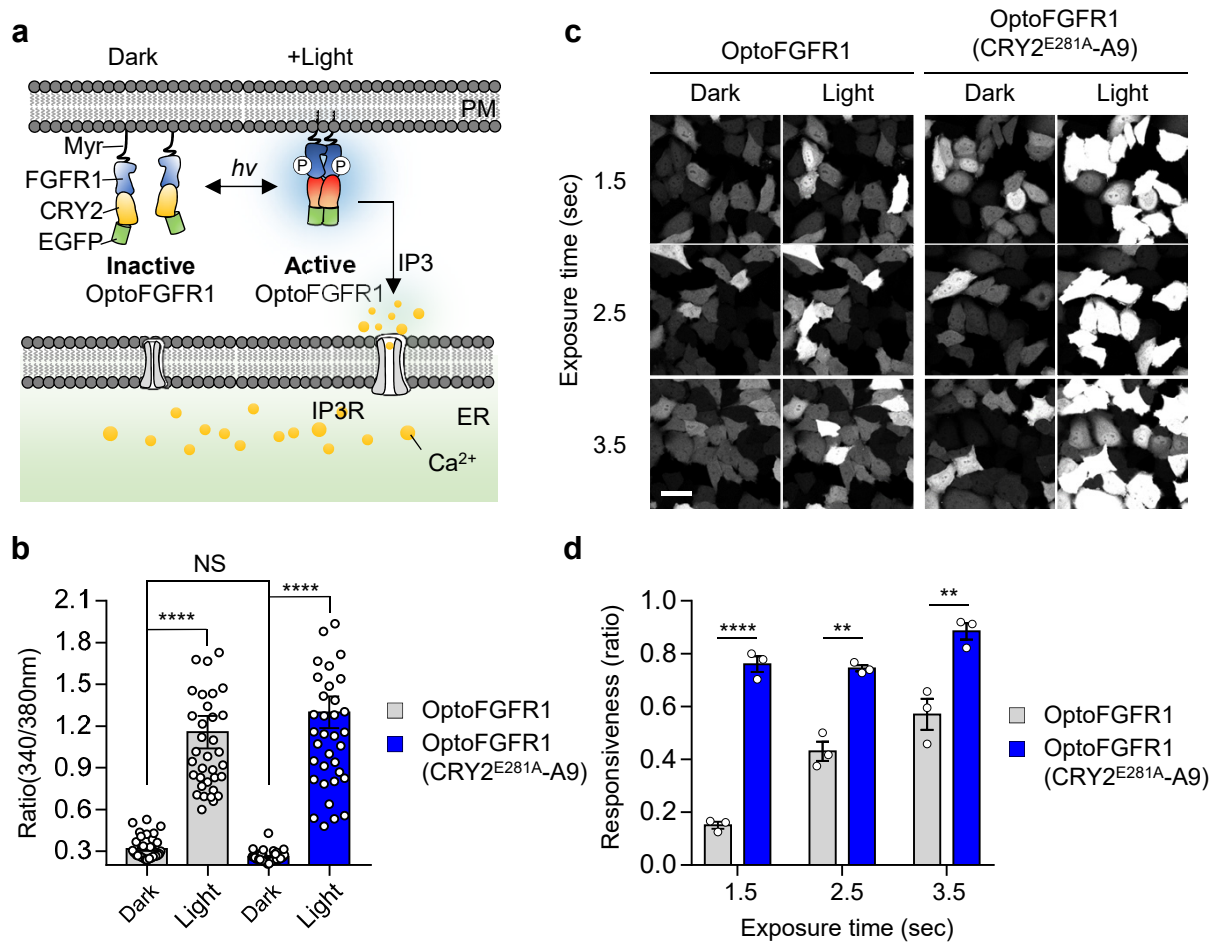

**(a)** Schematic working mechanism of OptoFGFR1 system. **(b)** Graphs showing emission ratio of Fura-2 dye (340/380 nm) before or after light illumination. Statistical significant was obtained by Tukey's test; NS = Not Significant compared to OptoFGFR1 without light; \*\*\*\* $P < 0.0001$ . Error bars, s.e.m. **(c)** Representative fluorescence images expressing either OptoFGFR1(CRY2) or OptoFGFR1 (CRY2<sup>E281A</sup>-A9) showing intensity of R-GECO1 upon various exposure time (488nm, 3  $\mu$ W  $mm^{-2}$ , 1.5/2.5/3.5 sec exposure). Scale bar, 20  $\mu$ m. **(d)** Graph showing light responded population of cells in each light condition. Responsiveness ratio indicate cells with light-mediated increment of R-GECO1 intensity over total cells. Statistical significant was obtained by Student's two-tailed  $t$ -test; \*\* $P < 0.01$ ; \*\*\*\* $P < 0.0001$ . Error bars, s.e.m.

**Supplementary Table. 1. Characteristics of OptoSTIM1 variants.**

| Mutant type        | Basal $[Ca^{2+}]_i$ (nM) | Max $[Ca^{2+}]_i$ (nM) | $Ta_{1/2}$ (sec) | $Td_{1/2}$ (sec) |
|--------------------|--------------------------|------------------------|------------------|------------------|
| Original OptoSTIM1 | 55.8 ± 2.7               | 292 ± 25.3             | 68.1 ± 3.9       | 352.1 ± 22.5     |
| CRY2(E279A)        | 54.4 ± 3.6               | 336.7 ± 39.7           | 76.6 ± 4.2       | 257.8 ± 29.5     |
| CRY2(G280W)        | 39.3 ± 2.7               | 268.7 ± 41.2           | 96.6 ± 4.7       | 159.2 ± 17.0     |
| CRY2(E281A)        | 38.2 ± 1.7               | 464.6 ± 38             | 62.0 ± 2.2       | 422.8 ± 33.8     |
| CRY2(A9)           | 40.5 ± 2.9               | 451.8 ± 36.5           | 40.4 ± 1.6       | 605.7 ± 37.0     |
| CRY2(E490G)        | 44.4 ± 2.5               | 414.8 ± 41.6           | 29.6 ± 1.3       | 481.4 ± 26.8     |
| CRY2(E281A-A9)     | 36.2 ± 1.5               | 458.3 ± 31.2           | 24.8 ± 1.0       | 513.5 ± 25.8     |
| CRY2(E281A,E490G)  | 38.5 ± 2.3               | 479.7 ± 45.5           | 50.4 ± 2.2       | 764.7 ± 41.3     |

Basal  $[Ca^{2+}]_i$  (nM) represents cytosolic  $Ca^{2+}$  concentration without photoactivation ± s.e.m. Max  $[Ca^{2+}]_i$  (nM) indicates maximal cytosolic  $Ca^{2+}$  concentration upon light illumination ± s.e.m.  $Ta_{1/2}$  (sec) and  $Td_{1/2}$  (sec) represent half-maximal time for reaching saturated R-GECO1 intensity upon light stimulation and basal R-GECO1 intensity in dark, respectively. Light-power density used was 500  $\mu W mm^{-2}$ .

**Supplementary Figure. 13. The LED array device for illuminating mice in homecage.**

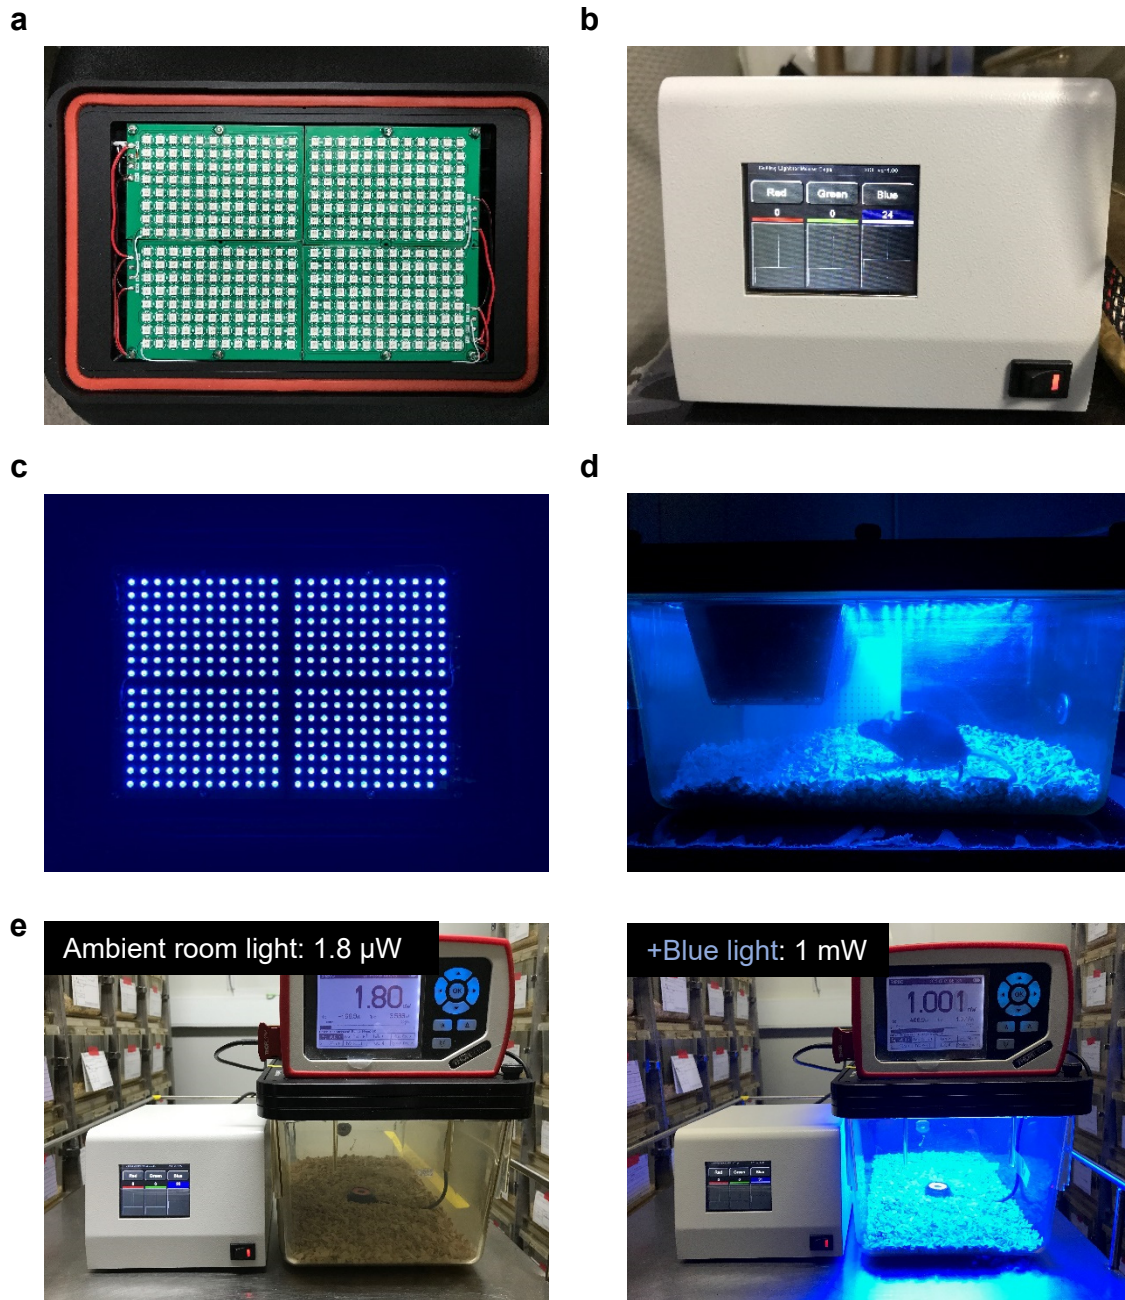

**(a)** Customized LED arrays attached on cage lid. Total 384 LED bulbs were used for illuminating light. **(b)** Control panel for modulating light density **(c)** Image depicting turned on LED-bulbs in **(a)**. **(d)** A picture showing side-view of LED cage. **(e)** Representative pictures showing light density of experimental condition of either ambient room light ( $1.8 \mu\text{W cm}^{-2}$  density, Left) and light (473 nm at  $1 \text{ mW cm}^{-2}$  density, Right).

**Supplementary Figure. 14. Locomotion and anxiety level of mice expressing OptoSTIM1s in the right ACC.**

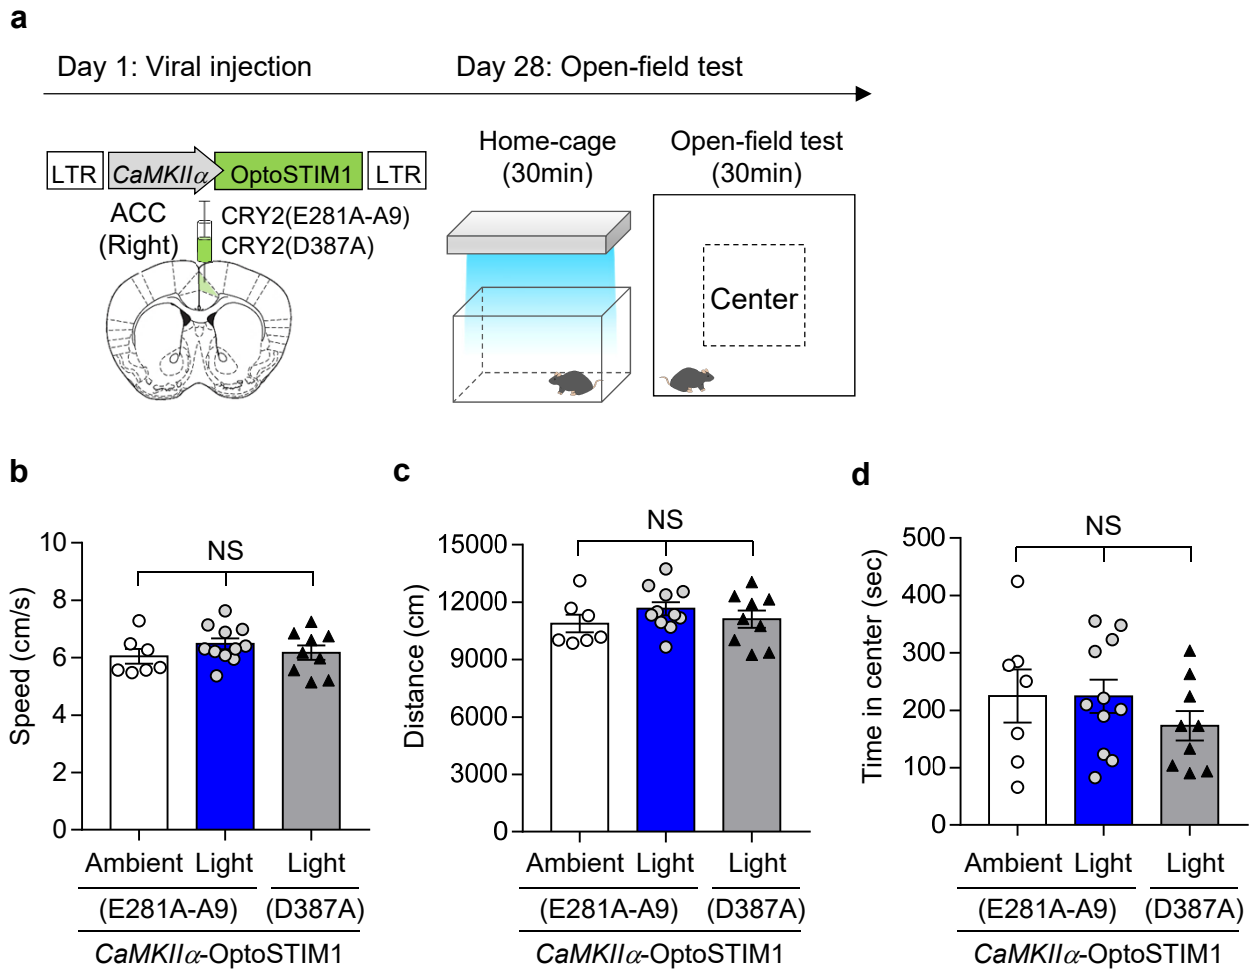

**(a)** Schematic depiction of open-field test. **(b, c, d)** Graphs indicating general locomotor activity including speed (cm/sec), total distance (cm), and anxiety level measured by time of mice residing in the center during 30 min exploration period. Center area was defined as 20 x 20 cm square in the middle of open-field box.  $n = 7$  (Ambient, E281A-A9);  $n = 11$  (Light, E281A-A9);  $n = 9$  (Light, D387A). Statistical significance was obtained by Tukey's test; NS = Not significant. Error bars, s.e.m.
