# Supplementary material for: Non-invasive optical control of endogenous Ca2+ channels in awake mice
Source: PubMed Central journal article supplement (PMC6954201; doi:10.1038/s41467-019-14005-4), 2020-01-10
Supplement: 41467_2019_14005_MOESM3_ESM.pdf [file 41467_2019_14005_MOESM3_ESM.pdf]

## Description of Additional Supplementary Files

**File name:** Supplementary Movie 1

**Description:** Monitoring behavior of a mouse before and after blue-light irradiation in the customized light-illuminating cage. Recorded behavior of a freely moving mouse residing in the homecage with a customized LED lid. Mouse in ambient condition (Left; 0 min to 30 min) was exposed to blue-light at  $1 \text{ mW cm}^{-2}$  density (Right; 30 min to 60 min).
